# Supplementary material for: Total mRNA Quantification in Single Cells: Sarcoma Cell Heterogeneity
Source: MDPI journal article supplement (doi:10.3390/cells9030759), 2020-03-19
Supplement: s1 [file s1]

# Total mRNA Quantification in Single Cells: Sarcoma Cell Heterogeneity

Emma Jonasson <sup>1</sup>, Lisa Andersson <sup>1</sup>, Soheila Dolatabadi <sup>1</sup>, Salim Ghannoum <sup>1</sup>, Pierre Åman <sup>1</sup> and Anders Ståhlberg <sup>1,2,3,\*</sup>

<sup>1</sup> Sahlgrenska Cancer Center, Department of Laboratory Medicine, Institute of Biomedicine, Sahlgrenska Academy at University of Gothenburg, SE-405 30, Gothenburg, Sweden; emma.jonasson@gu.se (E.J.); lisa.andersson.3@gu.se (L.A.); soheila.dolatabadi@gu.se (S.D.); salim.ghannoum@medisin.uio.no (S.G.); pierre.aman@gu.se (P.Å.)

<sup>2</sup> Department of Clinical Genetics and Genomics, Sahlgrenska University Hospital, SE-405 30, Gothenburg, Sweden

<sup>3</sup> Wallenberg Centre for Molecular and Translational Medicine, University of Gothenburg, SE-405 30, Gothenburg, Sweden

\* Correspondence: anders.stahlberg@gu.se; Tel.: +46-31-7866735

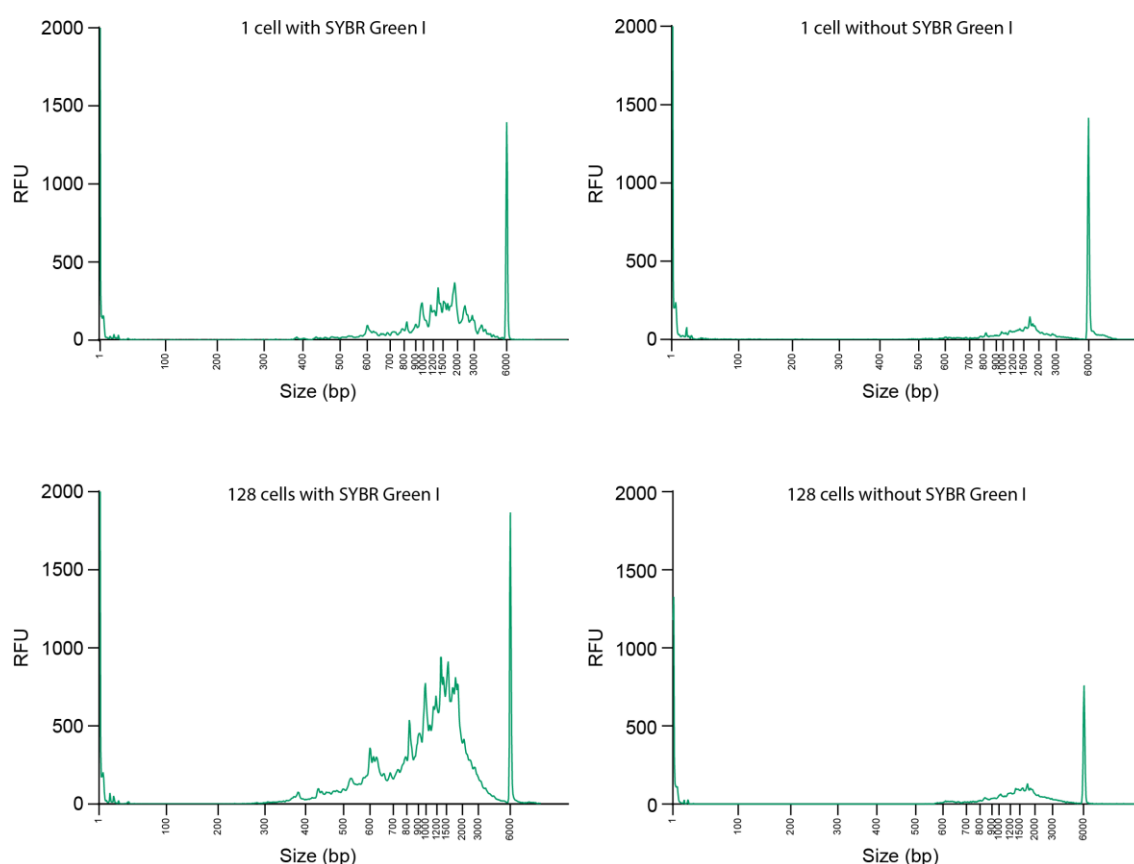

**Figure S1.** Size distribution assessment of preamplified cDNA. Size distribution analysis using Fragment Analyzer analysis of purified cDNA, preamplified for a limited number of cycles with and without SYBR Green I added to the reaction. Representative electropherograms for 128 cells and single cells are shown. RFU, Relative fluorescence unit.

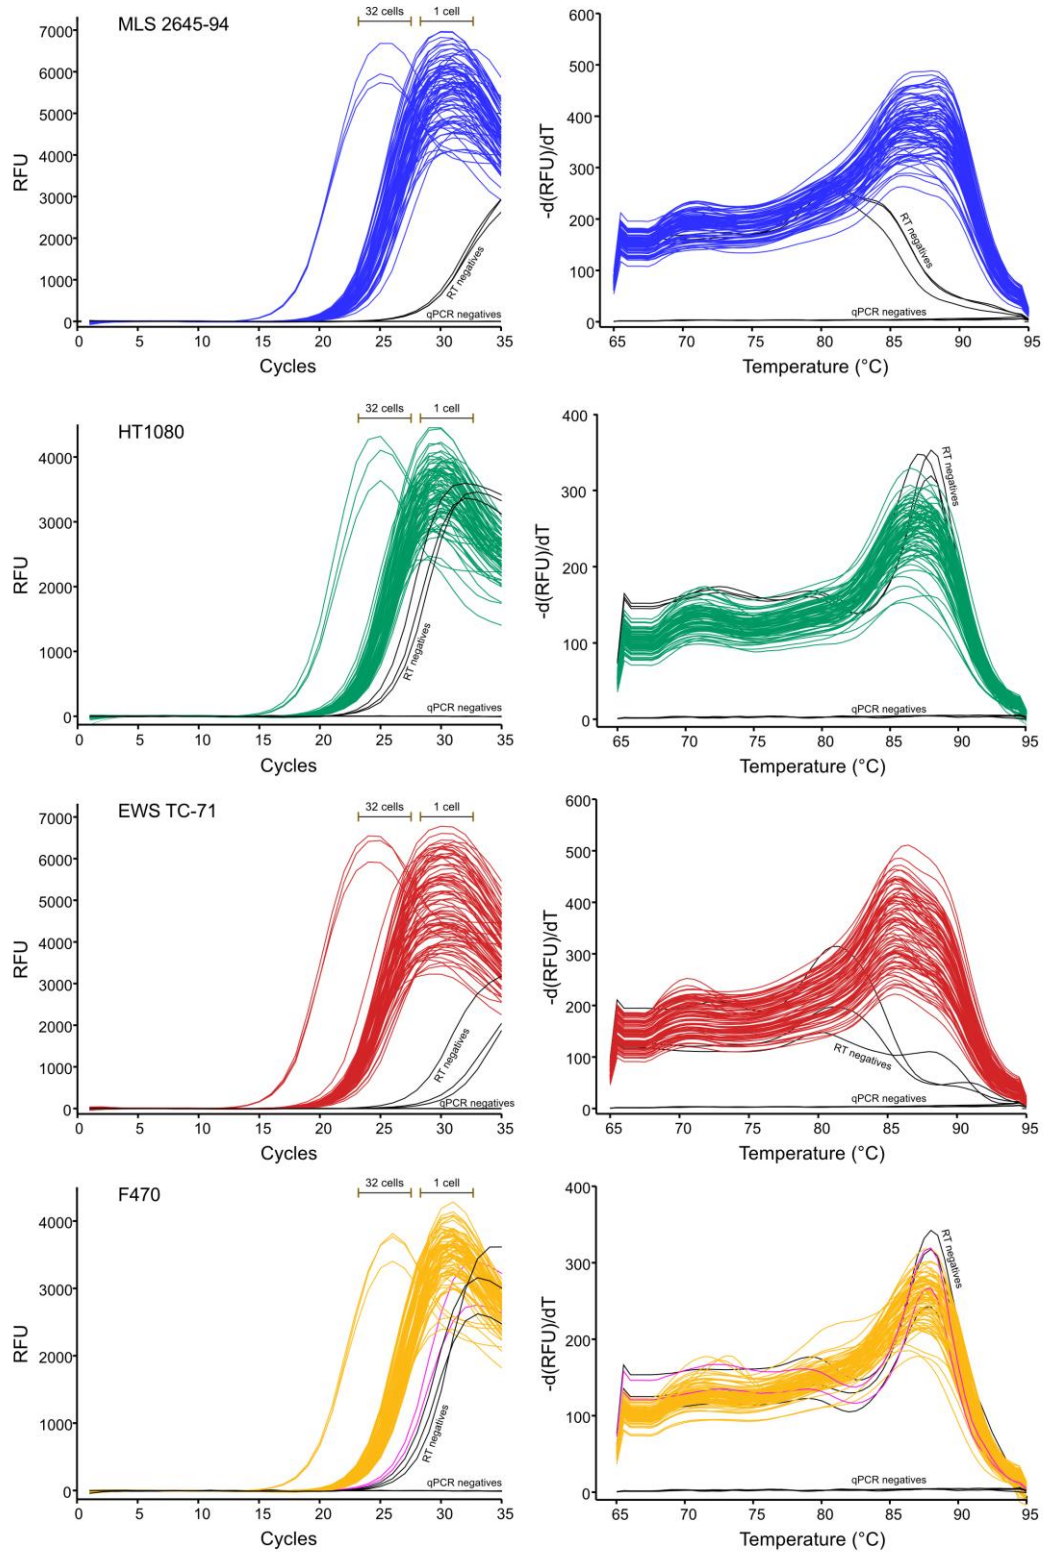

**Figure S2.** Preamplification and melting curves. **(A)** Preamplification curves of cDNA generated from myxoid liposarcoma (MLS) 2645-94, HT1080, Ewing sarcoma (EWS) TC-71 and F470. Single cells ( $n = 79-81$ ), 32 cells ( $n = 3$ ), cell-free negatives, *i.e.* reverse transcription negatives and qPCR negatives ( $n = 3$  each). The two samples in magenta were interpreted as empty wells or apoptotic/necrotic cells. **(B)** Melting curves of preamplified cDNA from MLS 2645-94, HT1080, EWS TC-71 and F470. Single cells ( $n = 79-81$ ), 32 cells ( $n = 3$ ), cell-free negatives, *i.e.* reverse transcription negatives and qPCR negatives ( $n = 3$  each). The two samples in magenta were interpreted as empty wells or apoptotic/necrotic cells. RFU, Relative fluorescence unit; T, Temperature.

**Table S1.** Pairwise statistical comparisons of relative expression levels between cell lines. Statistical tests were performed with Tukey's multiple comparison test.

| <b>Single cells</b>       | <b>Mean difference</b> | <b>Adjusted P value</b> |
|---------------------------|------------------------|-------------------------|
| MLS 2645-94 vs. HT1080    | 0.09                   | 0.67                    |
| MLS 2645-94 vs. EWS TC-71 | -0.49                  | <0.01                   |
| MLS 2645-94 vs. F470      | 0.73                   | <0.01                   |
| HT1080 vs. EWS TC-71      | -0.58                  | <0.01                   |
| HT1080 vs. F470           | 0.64                   | <0.01                   |
| EWS TC-71 vs. F470        | 1.22                   | <0.01                   |
| <b>32 cells</b>           | <b>Mean difference</b> | <b>Adjusted P value</b> |
| MLS 2645-94 vs. HT1080    | 0.85                   | <0.01                   |
| MLS 2645-94 vs. EWS TC-71 | -0.55                  | <0.01                   |
| MLS 2645-94 vs. F470      | 1.40                   | <0.01                   |
| HT1080 vs. EWS TC-71      | -1.40                  | <0.01                   |
| HT1080 vs. F470           | 0.54                   | <0.01                   |
| EWS TC-71 vs. F470        | 1.95                   | <0.01                   |
